# Supplementary material for: Machine learning models to accelerate the design of polymeric long-acting injectables
Source: PubMed Central journal article supplement (PMC9832011; doi:10.1038/s41467-022-35343-w), 2023-01-10
Supplement: 41467_2022_35343_MOESM3_ESM.pdf [file 41467_2022_35343_MOESM3_ESM.pdf]

## Description of Additional Supplementary Files

**Supplementary Data 1:** Initial dataset file used for ML model training. Includes 17 inputs features, fractional drug release targets, experimental indexes, and drug-polymer groups.
